# Supplementary material for: Pressure-driven multiple optoelectronic evolution in CsMoO3(IO3) with dual functional [MoO6] and [IO3] groups
Source: Royal Society of Chemistry journal article supplement (doi:10.1039/d3qm01147j), 2024-01-01
Supplement: d3qm01147j1.pdf [file d3qm01147j1.pdf]

## Electronic Supplementary Information

### Pressure-Driven Multiple Optoelectronic Evolution in $\text{CsMoO}_3(\text{IO}_3)$ with Dual Functional $[\text{MoO}_6]$ and $[\text{IO}_3]$ Groups

Dequan Jiang,<sup>\*a</sup> Chen Li,<sup>b</sup> Ting Wen<sup>b</sup>, Ke Liu,<sup>b</sup> Yingying Ma,<sup>b</sup> En Chen,<sup>b</sup> Tianyao Pei<sup>b</sup> and Yonggang Wang<sup>\*a</sup>

<sup>a</sup>School of Materials Science and Engineering, Peking University, Beijing 100871, China.

<sup>b</sup>Center for High Pressure Science and Technology Advanced Research (HPSTAR), Beijing 100193, China;

Email: [jdq@pku.edu.cn](mailto:jdq@pku.edu.cn), [ygw@pku.edu.cn](mailto:ygw@pku.edu.cn)

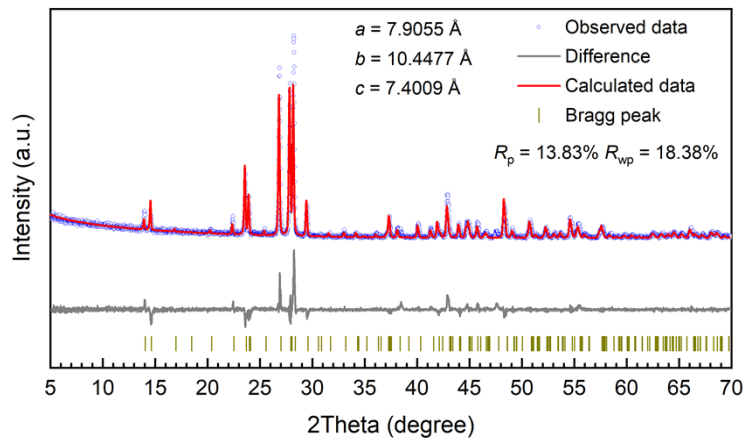

**Figure S1.** *Lebail* refinement of  $\text{CsMoO}_3(\text{IO}_3)$  at ambient condition with the space group of  $Pna2_1$ , cell parameters  $a = 7.9055 \text{ \AA}$ ,  $b = 10.4477 \text{ \AA}$ ,  $c = 7.4009 \text{ \AA}$ .

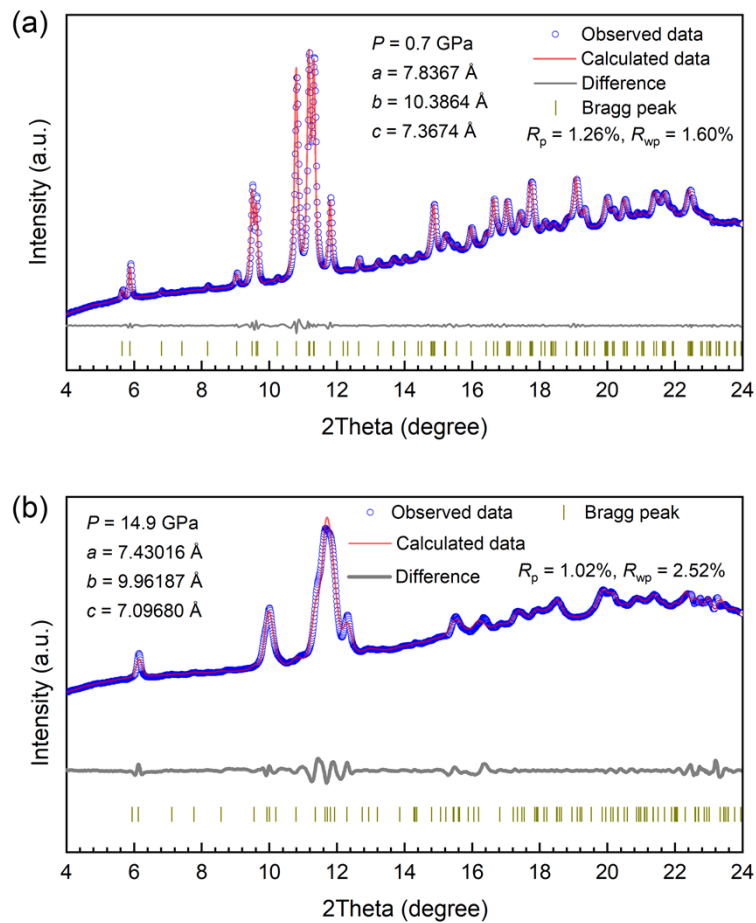

**Figure S2.** *Lebail* refinement of  $\text{CsMoO}_3(\text{IO}_3)$  at 0.7 GPa, and 14.9 GPa.

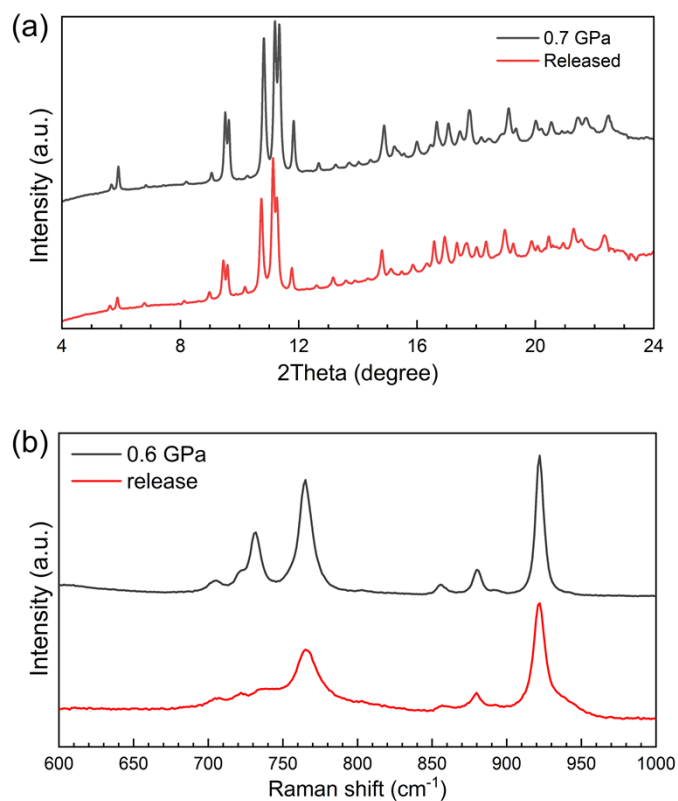

**Figure S3.** (a) The XRD patterns of the released sample and the sample at 0.7 GPa. (b) The Raman spectra the released sample and the sample at 0.6 GPa in the region of 600-1000 cm<sup>-1</sup>.

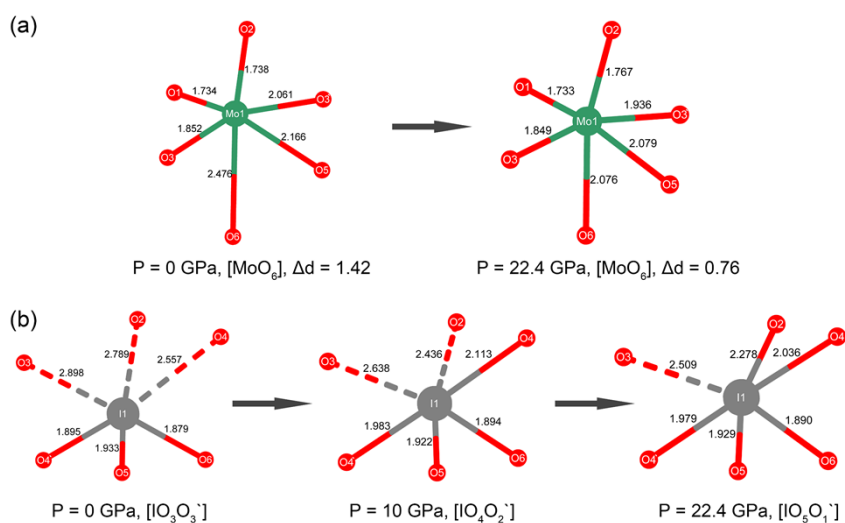

**Figure S4.** Models of the [MoO<sub>6</sub>] and [IO<sub>3</sub>] groups obtained by geometry optimization at selective pressures.

**Table S1.** The contribution of dual functional groups to the optoelectronic properties.

|                           | Piezochromism | SHG transformation | Enhancement of photocurrent switching ratio |
|---------------------------|---------------|--------------------|---------------------------------------------|
| [MoO <sub>6</sub> ] group | √             | √                  | √                                           |
| [IO <sub>3</sub> ] group  | ×             | √                  | √                                           |
